1 **Early Life Predictors of Obesity and Hypertension Comorbidity at Midlife: Findings from the**  
2 **1958 National Child Development Study (NCDS)**

3

4 S Stannard<sup>1</sup>(ORCID: 0000-0002-6139-1020), RK Owen<sup>2</sup>(ORCID: 0000-0001-5977-376X), A  
5 Berrington<sup>3</sup>(ORCID: 0000-0002-1683-6668), N Ziauddeen<sup>1</sup>(ORCID: 0000-0002-8964-5029), SDS  
6 Fraser<sup>1</sup>(ORCID: 0000-0002-4172-4406), S Paranjothy<sup>4</sup>, RB Hoyle<sup>5</sup>(ORCID: 0000-0002-1645-1071),  
7 N A Alwan<sup>1,6,7</sup>(ORCID: 0000-0002-4134-8463)

8

9 <sup>1</sup>School of Primary Care, Population Sciences and Medical Education, Faculty of Medicine,  
10 University of Southampton, Southampton, United Kingdom

11 <sup>2</sup>Population Data Science, Swansea University Medical School, Faculty of Medicine, Health & Life  
12 Science, Swansea University, Swansea, United Kingdom

13 <sup>3</sup>School of Economic, Social and Political Sciences, University of Southampton, Southampton,  
14 United Kingdom

15 <sup>4</sup>School of Medicine, Medical Sciences and Nutrition, University of Aberdeen

16 <sup>5</sup>School of Mathematical Sciences, University of Southampton, Southampton, United Kingdom

17 <sup>6</sup>University Hospital Southampton NHS Foundation Trust, Southampton, United Kingdom

18 <sup>7</sup>NIHR Applied Research Collaboration Wessex, Southampton, United Kingdom

19 Corresponding Author:

20 Sebastian Stannard - [S.J.Stannard@soton.ac.uk](mailto:S.J.Stannard@soton.ac.uk)

21 University of Southampton, University Road, Southampton, SO17 1BJ, United Kingdom

22 +44(0)23 8059 5000

23

24

25 **Abstract**

26 **Background:** Early life exposures can increase the risk of both obesity and hypertension in  
27 adulthood. In this paper we identify exposures across five pre-hypothesised childhood domains,  
28 explore them as predictors of obesity and hypertension comorbidity using the 1958 National Child  
29 Development Study (NCDS), and discuss these results in comparison to a similar approach using  
30 another birth cohort (the 1970 British Cohort Study (BCS70)).

31 **Methods:** The analytical sample included 9150 participants. The outcome was obesity (BMI of  $\geq 30$ )  
32 and hypertension (blood pressure  $> 140/90$  mm Hg) comorbidity at age 44. Domains included:  
33 ‘prenatal, antenatal, neonatal and birth’, ‘developmental attributes and behaviour’, ‘child education  
34 and academic ability’, ‘socioeconomic factors’ and ‘parental and family environment’. Stepwise  
35 backward elimination selected variables for inclusion for each domain, and predicted risk scores of  
36 obesity-hypertension for each cohort member within each domain were calculated. We performed  
37 multivariable logistic regression analysis including domain-specific risk scores, sex and ethnicity to  
38 assess how well the outcome could be predicted taking all domains into account. In additional  
39 analysis we included potential adult factors.

40 **Results:** Including all domain-specific risk scores, sex, and ethnicity in the same prediction model the  
41 area under the curve was 0.70 (95%CI 0.67-0.72). The strongest domain predictor for obesity-  
42 hypertension comorbidity was for the socioeconomic factors domain (OR 1.28 95%CI 1.18-1.38),  
43 similar to the BCS70 results. However, the parental and family environment domain was not a  
44 significant predictor for obesity-hypertension comorbidity (OR 1.08 95%CI 0.94-1.24) unlike the  
45 BCS70 results. After considering adult predictors, robust associations remained to the socioeconomic,  
46 education and academic abilities, development and behaviour, and prenatal, antenatal, neonatal and  
47 birth domains.

48 **Conclusions:** In the NCDS some early life course domains were found to be significant predictors of  
49 obesity-hypertension comorbidity, supporting previous findings. Shared early-life characteristics

50 could have a role in predicting obesity-hypertension comorbidity, particularly for those who faced  
51 socioeconomic disadvantage.

## 52 **Introduction**

53 In England an estimated 26% of adults have obesity (body mass index 30kg/m<sup>2</sup> or over) [1] and 31%  
54 of adults have hypertension (blood pressure over 140/90mm Hg) [2]. Both conditions are associated  
55 with further morbidities including Type 2 diabetes, heart disease, kidney disease, renal disease,  
56 strokes, and some cancers, including breast and bowel cancer [3-6]. Globally, both conditions  
57 represent a major public health problem. The World Health Organisation (WHO) estimates that 2.8  
58 million deaths every year are attributed to overweight or obesity [7]. Hypertension prevalence has  
59 increased between 41-144% across WHO regions over the past 30 years [8]. Research has also  
60 demonstrated that obesity and hypertension often co-occur [9,10]. For example, around half of  
61 hypertensive patients in the US have obesity [11], and individuals with obesity are 3.5 times more  
62 likely to have hypertension compared to normal weight individuals [12,13]. The co-occurrence of  
63 both conditions also increases the risk of further morbidity including cardiovascular disease, sexual  
64 dysfunction, poor quality of life and mortality [13,14].

65 It is important to consider risk exposures to subsequent morbidity in terms of multiple domains (i.e., a  
66 group of variables that represent an overarching theme) for three reasons. First, this provides a  
67 combined exposure measure that reflects multiple variables in the data rather than performing  
68 multiple statistical testing using single components in relation to the study outcomes. Second,  
69 conceptualising the components within wider early life domains provides a more holistic reflection of  
70 the childhood conditions in which the cohort member grew up. Third, considering early life risk in  
71 domains may better inform interventions and policy in childhood as incorporating information from  
72 multiple early life domains into the same analysis may help us understand the combined effects of  
73 different experiences across a range of early life domains on developing long-term conditions. This  
74 can provide actionable insights into developing interventions in childhood that may help support  
75 people to live longer in good health.

76

77 In previous research [15], we developed a conceptual framework to characterise the population-level  
78 domains of early-life determinants of future multimorbidity risk. Through a scoping literature and  
79 policy review, and with the support of public and patient contributors, 12 domains of early-life risk  
80 factors of future multimorbidity risk were identified [15]. These domains covered a range of social,  
81 economic, developmental, educational and environmental factors that focused on both direct and  
82 indirect factors as well as wider systemic and structural determinants of disease and health  
83 inequalities [15,16]. Subsequent research [17] explored how these 12 domains of early-life risk factors  
84 of future multimorbidity risk could be characterised across UK birth cohort studies including the 1958  
85 National Child Development Study (NCDS).

86

87 In a previous paper we used the 1970 British Cohort Study (BCS70) to consider five early life  
88 domains, chosen because they showed unadjusted associations with obesity and hypertension  
89 comorbidity at age 46 [18]. Results indicated all five domains were significant predictors for obesity-  
90 hypertension comorbidity, with the strongest domain predictors being the parental and family  
91 environment domain and the socioeconomic factors domain [18]. After including adult predictors, the  
92 most robust domains for predicting obesity-hypertension included the parental and family  
93 environment domain, socioeconomic factors domain and education and academic ability [18].

94 In this analysis, we aimed to apply the same methodological approach to the NCDS cohort. Although  
95 the two cohorts are only 12 years apart, the childhood conditions the members of each cohort grew up  
96 in are arguably different. The younger cohort (BCS70) experienced rising women's employment and  
97 economic independence, decreased family stability, educational expansion and a shift away from the  
98 male breadwinner nuclear family that dominated the family structure of the NCDS cohort [19-23].  
99 The younger cohort (BCS70) also experienced generational pay progression, higher real household  
100 disposable incomes and an increase in home ownerships [19], but globalisation and a shift of income  
101 from labour to capital meant greater economic uncertainty and increased inequality [23]. Therefore,  
102 these factors might lead us to expect more heterogeneity in the early life experiences of the 1970  
103 cohort compared to the 1958 cohort.

104 In this study, we aimed to explore the extent to which the same five early life course domains predict  
105 the outcome of obesity-hypertension comorbidity. To achieve this while weighting the components of  
106 each domain, we also produced -as a first stage of the analysis- predicted risk scores of the outcome  
107 for each of the five pre-defined early life domains. In the discussions we consider the results presented  
108 here in relation to a previous analysis of the BCS70 cohort [18]. This work forms part of a larger aim  
109 to model targeted multimorbidity prevention scenarios as part of the Multidisciplinary Ecosystem to  
110 study Lifecourse Determinants and Prevention of Early-onset Burdensome Multimorbidity (MELD-B)  
111 project [24].

112

## 113 **Methods**

### 114 ***Datasets***

115 We used the 1958 National Child Development Study (NCDS) [25] that has followed children born in  
116 England, Scotland and Wales in one week in 1958, and includes 17415 cohort members. The  
117 comorbidity outcome of obesity and hypertension was measured in a biomedical sweep at age 44. All  
118 other variables were measured either at birth or at the age 11 sweep.

### 119 ***Outcome***

120 The outcome was a combined obesity-hypertension phenotype at age 44. Blood pressure was  
121 measured via three systolic and diastolic blood pressure readings during a single appointment from a  
122 research nurse. Hypertension was defined as average blood pressure reading of over 140/90 mm Hg.  
123 BMI was calculated via height and weight measurements taken during the same nurse appointment,  
124 and calculated using the following formula:  $BMI = \text{weight (kg)} / \text{height (m)}^2$ . Obesity was defined as  
125 a BMI of  $30\text{kg/m}^2$  or over. The obesity-hypertension comorbidity variable was considered as a binary  
126 (no/yes) variable.

### 127 ***Exposures (Five pre-hypothesised domains)***

128 We focus on five domains because they showed unadjusted association with the outcome in this paper  
129 and in the previous research based on the BCS70 cohort [18], and Supplementary Materials Table 1  
130 includes all the variables that were considered for each domain:

- 131 1. *Prenatal, antenatal, neonatal and birth domain* focused on the period from conception to the  
132 onset of labour, the circumstances and outcomes surrounding a birth, and the period  
133 immediately following birth.
- 134 2. *Developmental attributes and behaviour domain* focused on the developmental markers of  
135 children relating to cognition, coordination, personality types and behavioural traits.
- 136 3. *Child education and academic ability domain* related to the process of learning and  
137 educational achievement, especially in educational settings, and the knowledge an individual  
138 gains from these educational institutions.
- 139 4. *Socioeconomic factors domain* included factors relating to differences between individuals or  
140 groups of people caused mainly by their social and economic situation.
- 141 5. *Parental and family environment domain* incorporated the interactions between children and  
142 care givers, parenting styles, parental beliefs, attitudes and discipline, and wider family  
143 factors such as kin networks.

#### 144 *Analytical sample*

145 The analytical sample included all cohort members who had measured height, weight, and blood  
146 pressure at age 44 (n = 9150/17415). Multiple imputation was used to maintain sample size and  
147 reduce bias in the estimates due to missing data. Multiple imputation was conducted by chained  
148 equations for missing observations at birth, age 11, and 44 [26]. 50 imputation cycles were  
149 constructed under the missing-at-random assumption [27-29], which has been found to be highly  
150 plausible in the British birth cohorts [30]. All variables were included in the imputation process. The  
151 outcome was included in the imputed models, but imputed outcome values were not used.

#### 152 *Statistical analysis*

153 We used the same methodological approach followed to examine five early-life domains as predictors  
154 of obesity-hypertension comorbidity in the BCS70 cohort, and full details of this method can be found  
155 elsewhere [18]. However, we provide a summary of those methods here.

156 Firstly, stepwise backward elimination conducted on multiple imputed data, was used to select  
157 variables for inclusion separately for each domain. Secondly, logistic regression models then explored  
158 the relationship between retained variables following stepwise backwards elimination and odds of  
159 obesity-hypertension comorbidity. From this regression modelling the predicted risk scores of the  
160 obesity-hypertension comorbidity outcome for each cohort member within each domain were then  
161 calculated. Thirdly, we used logistic regression modelling including all five domain-specific risk  
162 scores, and added sex (determined at birth by the presence or absence of a Y chromosome), and  
163 ethnicity to predict the obesity-hypertension comorbidity outcome. The area under curve statistic was  
164 used to assess the predictive performance of this model. The odds ratios of the five domains within  
165 this model were used to identify the strongest domains that acted as predictors for obesity and  
166 hypertension comorbidity taking into account the effect of the other domains. Finally, we repeated the  
167 previous step this time with the inclusion of adult factors that are potentially linked to both the  
168 exposures and the outcome. These were recorded at age 44 and included marital status, self-rated  
169 financial difficulty, the age the cohort member left education, smoking status, frequency of consuming  
170 alcoholic drinks, frequency of consuming fresh fruit, frequency of exercising and occupational social  
171 class.

## 172 **Ethical Approval**

173 Ethics approval for MELD-B was obtained from the University of Southampton Faculty of Medicine  
174 Ethics committee (ERGO II Reference 66810). A full review of ethics and consent for the NCDS  
175 study is provided by the Centre for Longitudinal Studies and can be found elsewhere [31].

176

## 177 **Results**

178 *Step 1: Stepwise backwards elimination to select variables for inclusion separately for each domain.*

179 Table 1 identifies the retained variables following stepwise backwards elimination for each domain in  
 180 relation to the outcome of obesity-hypertension comorbidity at age 44. Amongst the 9150 cohort  
 181 members at age 44, 4% (n=395) had obesity-hypertension comorbidity. Considering the individual  
 182 prevalence, 24% of the cohort members at age 44 had obesity (n=2235/9150) and 11% had  
 183 hypertension (n=1049/9150). For the prenatal, antenatal, neonatal and birth domain, the retained  
 184 variables following stepwise backwards elimination focused on the health of the cohort member at  
 185 birth (illness, resuscitation and admission to hospital). For the developmental attributes and behaviour  
 186 domain, retained variables considered developmental markers of the cohort members (coordination  
 187 and balance), whilst father’s social class was retained within the socioeconomic factors domain. For  
 188 the child education and academic ability domain, retained variables were related to academic ability  
 189 (general ability test, general knowledge assessment and oral ability assessment), and for the parental  
 190 and family environment domain, retained variables focused on fathers’ interest in their child’s  
 191 education and engaging in family activities (family walks).

192 *Table 1. Step 1: Variables retained in the five domain risk scores following stepwise backwards*  
 193 *elimination, and prevalence of combined obesity-hypertension at age 44.*

|                                                                                     |                              |                                  | <b>Obesity and hypertension</b> |      |                     |
|-------------------------------------------------------------------------------------|------------------------------|----------------------------------|---------------------------------|------|---------------------|
|                                                                                     |                              |                                  | No                              | Yes  | Total               |
|                                                                                     |                              |                                  | N                               | N    | Sample <sup>1</sup> |
|                                                                                     |                              |                                  | (%)                             | (%)  |                     |
| <b>Prenatal, antenatal, neonatal and birth domain (variables recorded at birth)</b> | Child resuscitation at birth | No                               | 7934                            | 357  | 8291                |
|                                                                                     |                              |                                  | 95.7%                           | 4.3% |                     |
|                                                                                     |                              | Yes                              | 158                             | 13   | 171                 |
|                                                                                     |                              |                                  | 92.4%                           | 7.6% |                     |
|                                                                                     | Hospital admission at birth  | No admission                     | 6549                            | 273  | 6833                |
|                                                                                     |                              |                                  | 96.0%                           | 4.0% |                     |
|                                                                                     |                              | Admission for toxemia            | 562                             | 55   |                     |
|                                                                                     |                              | 92.7%                            | 7.2%                            |      |                     |
|                                                                                     |                              | Admission for other condition(s) | 975                             | 48   | 1023                |
|                                                                                     |                              | 95.3%                            | 4.7%                            |      |                     |
| Baby illness at birth                                                               | No illness                   | 7840                             | 352                             | 8192 |                     |
|                                                                                     |                              | 95.7%                            | 4.3%                            |      |                     |
|                                                                                     | Illness                      | 207                              | 16                              |      | 223                 |
|                                                                                     | 92.8%                        | 7.2%                             |                                 |      |                     |
| <b>Developmental attributes and behaviour domain (variables</b>                     | Poor physical coordination   | Not at all                       | 6311                            | 284  | 6595                |
|                                                                                     |                              |                                  | 95.7%                           | 4.3% |                     |
|                                                                                     |                              | Somewhat                         | 870                             | 48   |                     |
|                                                                                     | 94.8%                        | 5.2%                             |                                 |      |                     |
|                                                                                     | Certainly applies            | 134                              | 10                              |      |                     |



|                                                                                   |                                         |                   |        |      |      |
|-----------------------------------------------------------------------------------|-----------------------------------------|-------------------|--------|------|------|
| <b>recorded at age 11)</b>                                                        | Standing heel to toe                    | Very steady       | 93.1%  | 6.9% | 144  |
|                                                                                   |                                         |                   | 3807   | 150  |      |
|                                                                                   |                                         | Slightly unsteady | 96.2%  | 3.8% | 3957 |
|                                                                                   |                                         |                   | 2667   | 140  |      |
|                                                                                   |                                         |                   | 95.1%  | 5.0% | 2807 |
| Very unsteady                                                                     | 587                                     | 37                |        |      |      |
|                                                                                   | 94.1%                                   | 5.9%              | 624    |      |      |
| <b>Socioeconomic factors domain (variables recorded at age 11)</b>                | Fathers social class                    | I                 | 460    | 11   |      |
|                                                                                   |                                         |                   | 97.7%  | 2.3% | 471  |
|                                                                                   |                                         | II                | 1451   | 39   |      |
|                                                                                   |                                         |                   | 97.5%  | 2.6% | 1490 |
|                                                                                   |                                         | III (non-manual)  | 742    | 28   |      |
|                                                                                   |                                         |                   | 96.4%  | 3.6% | 770  |
|                                                                                   |                                         | III (manual)      | 3026   | 159  |      |
|                                                                                   |                                         |                   | 95.0%  | 5.0% | 3185 |
|                                                                                   |                                         | IV (non-manual)   | 138    | 12   |      |
|                                                                                   |                                         |                   | 92.0%  | 8.0% | 150  |
| IV (manual)                                                                       | 1085                                    | 56                |        |      |      |
|                                                                                   | 95.1%                                   | 4.9%              | 1141   |      |      |
| V                                                                                 | 359                                     | 30                |        |      |      |
|                                                                                   | 92.3%                                   | 7.7%              | 389    |      |      |
| <b>Child education and academic ability domain (variables recorded at age 11)</b> | General knowledge – teachers assessment | Exceptional       | 2209   | 82   |      |
|                                                                                   |                                         |                   | 96.4%  | 3.6% | 2291 |
|                                                                                   |                                         | Above average     | 3456   | 170  |      |
|                                                                                   |                                         |                   | 95.3%  | 4.7% | 3626 |
|                                                                                   |                                         | Average and below | 95.1%  | 97   |      |
|                                                                                   |                                         |                   | 4.9%   | 1977 |      |
|                                                                                   | Oral ability – teachers assessment      | Exceptional       | 1995   | 60   |      |
|                                                                                   |                                         |                   | 97.1%  | 2.9% | 2055 |
|                                                                                   |                                         | Above average     | 4214   | 208  |      |
|                                                                                   |                                         |                   | 95.3%  | 4.7% | 4422 |
|                                                                                   |                                         | Average and below | 1336   | 81   |      |
|                                                                                   |                                         |                   | 94.3%  | 5.7% | 1417 |
| General ability test score                                                        | No obesity-hypertension – mean (SD)     |                   | 45.7   |      |      |
|                                                                                   |                                         |                   | (15.3) | 7587 |      |
|                                                                                   | Yes obesity-hypertension – mean (SD)    |                   | 42.0   |      |      |
|                                                                                   |                                         |                   | (15.7) | 347  |      |
| <b>Parental and family environment domain (variables recorded at age 11)</b>      | Family walks                            | Most weeks        | 4057   | 172  |      |
|                                                                                   |                                         |                   | 96.1%  | 3.9% | 4229 |
|                                                                                   |                                         | Occasionally      | 2966   | 150  |      |
|                                                                                   |                                         |                   | 95.2%  | 4.8% | 3116 |
|                                                                                   |                                         | Hardly ever       | 386    | 27   |      |
|                                                                                   | 93.5%                                   |                   | 6.5%   | 413  |      |
|                                                                                   | Father’s interest in child’s education  | Very interested   | 3232   | 124  |      |
|                                                                                   |                                         |                   | 96.3%  | 3.7% | 3356 |
|                                                                                   |                                         | Some interest     | 2539   | 134  |      |
|                                                                                   |                                         |                   | 95.0%  | 5.0% | 2673 |
| Little interest                                                                   |                                         | 862               | 48     |      |      |
|                                                                                   | 94.7%                                   | 5.3%              | 910    |      |      |
| Can’t say/no father                                                               | 780                                     | 39                |        |      |      |
|                                                                                   | 95.2%                                   | 4.8%              | 819    |      |      |

194 <sup>1</sup>The total sample size was based on the specific sample available at the sweep in which the variable

195 was reported or measured.

196 *Step 2: Predicted risk scores of obesity-hypertension comorbidity for each cohort member within each*  
197 *domain.*

198 In Supplementary Materials Table 3-7, we include the regression coefficients of obesity-hypertension  
199 for the logistic regression models that explored the relationship between retained variables following  
200 stepwise backwards elimination (step 1) and obesity-hypertension comorbidity, and for each domain  
201 separately. In Supplementary Materials 2, we present a Pearson correlation matrix exploring  
202 correlation across domains. The strongest correlations were between the parental and family  
203 environment domain and child education and academic ability domain (coefficient 0.31) and between  
204 the parental and family environment domain and socioeconomic factors domain (coefficient 0.29).  
205 These results suggest that the domain-specific risk scores were not collinear.

206 *Step 3: A prediction model including five domain-specific risk scores, sex and ethnicity.*

207 The area under curve (AUC) for the prediction model that included all five domain-specific risk  
208 scores (produced in step 2), ethnicity, and sex was 0.70 (95%CI 0.67-0.72). Table 2 presents the odds  
209 ratios of obesity-hypertension at age 44 for the prediction model that included all five domain-specific  
210 risk scores (produced in step 2), sex, and ethnicity. As shown, the parental and family environment  
211 domain was not a significant predictor of obesity-hypertension comorbidity (OR 1.08 95%CI 0.94-  
212 1.24). All other domains were predictors of obesity-hypertension comorbidity, with the strongest  
213 domain predictor being the socioeconomic factors domain (OR 1.28 95%CI 1.19-1.38).

214 *Table 2. Step 3: Odds ratios of obesity-hypertension at age 46 in relation to domain-specific risk score*  
215 *of obesity-hypertension for five early life domains. Multiple imputed data (50 Imputations).*

|                                                | Odds ratios | 95% Confidence interval |
|------------------------------------------------|-------------|-------------------------|
| Developmental attributes and behaviour domain  | <b>1.20</b> | <b>1.06 - 1.36</b>      |
| Prenatal, antenatal, neonatal and birth domain | <b>1.21</b> | <b>1.11 - 1.31</b>      |
| Parent and family environment domain           | 1.08        | 0.94 - 1.24             |
| Education and academic ability domain          | <b>1.12</b> | <b>1.02 - 1.23</b>      |

|                                           |             |                    |
|-------------------------------------------|-------------|--------------------|
| Socioeconomic factors domain              | <b>1.28</b> | <b>1.19 - 1.38</b> |
| Child's sex: Women (base – men)           | <b>0.38</b> | <b>0.64 - 0.91</b> |
| Mother ethnic group: Other (base – white) | 1.37        | 0.86 - 2.21        |
| Number of observations                    |             | 9150               |

216 *Significant findings highlighted in bold.*

217 *Step 4: A prediction model including five domain-specific risk scores, sex, ethnicity and potential*  
 218 *adult predictors.*

219 Including adult factors in the model, the AUC increased to 0.73 (95%CI 0.71-0.76). Table 3 presents  
 220 the odds ratios of obesity-hypertension at age 44 for this prediction model that included all five  
 221 domain specific risk scores (produced in step 2) ethnicity, sex and adult factors. As shown, after the  
 222 inclusion of adult factors, the prenatal, antenatal, neonatal and birth domain was not a significant  
 223 predictor of obesity-hypertension comorbidity (OR 1.08 95%CI 0.94-1.25). All the other four domains  
 224 remained robust predictors for obesity and hypertension comorbidity, with the strongest domain  
 225 predictor for obesity and hypertension comorbidity remaining as the socioeconomic factors domain  
 226 (OR 1.29 95%CI 1.19-1.39).

227 *Table 4. Step 4: Odds ratios of obesity-hypertension at age 46 in relation to domain-specific risk score*  
 228 *of obesity-hypertension for five early life domains including adult predictors. Multiple imputed data*  
 229 *(50 Imputations).*

|                                                | OR          | 95% Confidence Interval |
|------------------------------------------------|-------------|-------------------------|
| Developmental attributes and behaviour domain  | <b>1.19</b> | <b>1.05 - 1.35</b>      |
| Prenatal, antenatal, neonatal and birth domain | <b>1.20</b> | <b>1.11 - 1.30</b>      |
| Parent and family environment domain           | 1.08        | 0.94 - 1.25             |
| Education and academic ability domain          | <b>1.13</b> | <b>1.03 - 1.25</b>      |
| Socioeconomic factors domain                   | <b>1.29</b> | <b>1.19 - 1.39</b>      |
| Child's sex: Women (base – men)                | <b>0.42</b> | <b>0.32 - 0.54</b>      |
| Mother ethnic group: Other (base – white)      | 1.44        | 0.88 - 2.33             |
| Smoking: Used to smoke (base – Never smoked)   | 0.93        | 0.73 – 1.19             |

It is made available under a [CC-BY 4.0 International license](https://creativecommons.org/licenses/by/4.0/) .

|                                                            |             |                    |
|------------------------------------------------------------|-------------|--------------------|
| Occasionally smokes                                        | <b>0.40</b> | <b>0.19 – 0.83</b> |
| Regularly smokes                                           | <b>0.59</b> | <b>0.42 - 0.76</b> |
| Marital status: Cohabiting (base – Married)                | <b>0.53</b> | <b>0.33 – 0.84</b> |
| Single never married                                       | 1.12        | 0.78 – 1.60        |
| Separated/divorced                                         | 0.77        | 0.52 – 1.16        |
| Alcohol consumption: Most days (base – Occasionally)       | <b>1.23</b> | <b>1.10 - 2.54</b> |
| 2 to 3 days a week                                         | 1.31        | 0.88 – 1.95        |
| Once a week                                                | 1.02        | 0.66 – 1.57        |
| 2 to 3 times a month                                       | <b>1.88</b> | <b>1.20 – 2.93</b> |
| Never                                                      | 1.17        | 0.63 – 2.14        |
| Social class: Lower managerial (base - higher managerial)  | 1.64        | 0.89 - 3.02        |
| Skilled manual                                             | 1.34        | 0.67 – 2.65        |
| Skilled non-manual                                         | 1.77        | 0.93 – 3.37        |
| Partly-skilled                                             | 1.51        | 0.74 – 3.01        |
| Unskilled                                                  | 1.11        | 0.43 – 2.86        |
| Unemployed                                                 | 1.65        | 0.80 – 3.39        |
| Days exercise per week: 4-5 days (base – every day)        | 1.38        | 0.88 – 2.16        |
| 2-3 days                                                   | 1.32        | 0.91 – 1.94        |
| Once a week                                                | 1.21        | 0.81 – 1.80        |
| 2-3 times a month                                          | 1.60        | 0.98 – 2.60        |
| Less often                                                 | <b>1.67</b> | <b>1.17 – 2.38</b> |
| Fruit consumption: every day (base – more than once a day) | 1.18        | 0.85 - 1.61        |
| 3-6 days a week                                            | 1.31        | 0.89 - 1.90        |
| 1-2 days a week                                            | 1.05        | 0.72 - 1.51        |
| Less than once a week                                      | <b>1.63</b> | <b>1.03 – 2.58</b> |
| Occasionally                                               | 1.04        | 0.69 - 1.57        |
| Never                                                      | <b>1.87</b> | <b>1.01 – 3.44</b> |
| Managing financially: doing all right (base - doing well)  | 0.82        | 0.64 - 1.06        |
| Just about getting by                                      | 0.96        | 0.72 - 1.29        |
| Finding it quite difficult                                 | 0.98        | 0.60 – 1.62        |
| Finding it very difficult                                  | 0.73        | 0.31 – 1.72        |
| Age left education                                         | 0.97        | 0.62 - 1.04        |
| Number of observations                                     |             | 9150               |

230 *Significant findings highlighted in bold.*

231 **Discussion**

232 Using the NCDS birth cohort dataset, and considering five early life domains concurrently, the  
233 strongest domain predictor for obesity-hypertension comorbidity was the socioeconomic factors  
234 domain, even after accounting for socioeconomic factors during adulthood. Results suggested that the  
235 parental and family environment domain was not a significant predictor for obesity-hypertension  
236 comorbidity in adulthood. The inclusion of adult factors slightly improved the predictive performance  
237 of the models, however robust associations remained to the development and behaviour, the  
238 socioeconomic factors, education and academic abilities and prenatal, antenatal, neonatal and birth  
239 domains.

240 Our aim in this paper was to use the same methodological approach that has already been applied to  
241 the BCS70 cohort [18] to explore the relationship between five early life domains and obesity-  
242 hypertension comorbidity, and then compare results across the two cohort studies. We found that the  
243 results presented here were largely comparable to our previous findings based on the BCS70 cohort  
244 [18], in particular there was consistency with regards to the robustness of the socioeconomic factors  
245 domain as a predictor for obesity-hypertension comorbidity across both papers [18]. Significantly, the  
246 socioeconomic factors domain (in childhood) remained an important predictor even after accounting  
247 for socioeconomic factors during adulthood. This adds to a body of literature that has found childhood  
248 socioeconomic factors to be associated to multimorbidity later in the life course [32-36], and provides  
249 further justification for interventions targeting socioeconomic conditions in childhood as this might  
250 have the biggest impact on improving certain health outcomes later in the life course. The findings  
251 that the socioeconomic domain remains important across cohorts is significant given the BCS70  
252 cohort (born 1970) were exposed to better economic conditions including higher employment rates  
253 particularly for women, generational pay progression, higher real household disposable incomes and  
254 an increase in home ownerships [19].

255 Overall, the AUC statistics suggested that for both models (including and excluding adult predictors),  
256 variables within the NCDS cohort had a stronger predictive power than variables within the BCS70

257 cohort. Odds ratios (across all models) in the NCDS cohort were also larger than in the BCS70 cohort.  
258 Further, after considering the role of adult predictors, more robust associations between early life  
259 domains and hypertension and obesity comorbidity remained in the NCDS cohort compared to the  
260 BCS70 cohort. These three factors may indicate that obesity-hypertension comorbidity is more closely  
261 related to the domain-specific risk scores in the NCDS compared to the BCS70.

262 For the BCS70 cohort, the parental and family environment domain was a robust predictor of obesity-  
263 hypertension, but in the NCDS cohort, it was not a predictor. One explanation for this difference is the  
264 wider demographic and social context of the parental-family environment in which each cohort grew  
265 up. For the NCDS cohort (born 1958), most children grew up in households dominated by a stable  
266 nuclear-family model [37]. However, the BCS70 cohort (born 1970) grew up during a period of rapid  
267 change within the parental-family environment. The liberalisation of divorce laws coupled with  
268 changing attitudes and norms relating to marriage were reflected in a sharp rise in divorce rates and a  
269 decline in first marriage rates from the 1970s onwards [38,39]. The BCS70 cohort grew up during a  
270 period of increasing rates of parental partnership dissolution, single parent households and a rise in  
271 children living with non-biological parents and non-full siblings, and this is reflected by the retained  
272 variables following stepwise backwards elimination (step 1 of the analysis). Specifically the BCS70,  
273 unlike the NCDS, retained variables relating to the father of the cohort member including father figure  
274 and if the father helps manage the cohort member. Therefore, it could be hypothesised that the impact  
275 of these rapid changes to the parental-family environment, particularly around the role of fathers, had  
276 a greater impact on the BCS70 cohort compared to the NCDS who were less exposed to these  
277 changes. This is demonstrated in a paper that found women in the BCS70 who experienced parental  
278 separation were more like to have hypertension at age 46, compared to those who had not experienced  
279 a parental separation in childhood [40].

280 A further cohort effect is within the antenatal, neonatal, prenatal and birth domain which was a robust  
281 predictor of obesity-hypertension comorbidity in the NCDS cohort but not in the BCS70 cohort. It is  
282 likely that even over this short 12-year period, obstetric, neonatal and speciality care for ill infants  
283 will have improved [41], thus potentially reducing the impact of antenatal, neonatal, prenatal and birth

284 adversity in the younger cohort (BCS70). Another difference between the antenatal, neonatal, prenatal  
285 and birth domain was that the stepwise backwards selection (step 1 of the analysis) retained different  
286 variables. The variables retained in the NCDS cohort focused on the health of the child at birth  
287 whereas, for the BCS70 cohort, the retained variables focussed on factors relating to maternal fertility  
288 history and maternal health behaviours during pregnancy.

289 In the NCDS the prevalence of obesity, hypertension and combined hypertension-obesity was lower  
290 than observed in the BCS70 cohort [18], suggesting that those with the outcome in the NCDS cohort  
291 may be a more select group of individuals. However, given that blood pressure increases with age [42]  
292 and that the BCS70 cohort were slightly older than the NCDS cohort at outcome data collection, it is  
293 important to note this relationship between blood pressure and age might explain some of the  
294 increased prevalence of obesity-hypertension amongst the older BCS70 cohort. In the BCS70 study  
295 we additionally classified hypertension if a participant had received a doctor's diagnosis of high blood  
296 pressure or hypertension at age 46 (self-reported) even if the blood pressure measurement was less  
297 than 140/90 mm Hg, to account for those who may have had a lower blood pressure reading due to  
298 hypertension medication. In the NCDS self-reported hypertension was not asked.

299 There are a number of important next steps. We have identified robust domains that predict obesity-  
300 hypertension comorbidity, the next step therefore could include modelling prevention scenarios within  
301 these domains to better inform policy to help people live in better health for longer. Secondly, it is  
302 important to expand the methods presented here to consider the relationship to other multimorbidity  
303 clusters and outcomes that develop a more sophisticated understanding of multimorbidity, including  
304 focussing on burdensomeness and complexity for example incorporating eight themes of 'work'  
305 burden for those living with multimorbidity [43].

306

### 307 *Strengths and limitations*

308 The NCDS dataset allowed us to explore a wide array of social, environmental, and family variables  
309 in childhood to represent five early-life domains. The data also afforded the opportunity to analyse

310 potential adult predictors and objective measures of both obesity and hypertension measured at  
311 midlife.

312 A limitation of the NCDS cohort was the significant under-representation of individuals from non-  
313 white ethnic backgrounds and therefore the cohort does not reflect the ethnic diversity of the British  
314 population today. Further using BMI (to indicate obesity) is limited given the established research that  
315 has demonstrated the measure risks overestimating body fat in those who have muscular builds [44].  
316 Another limitation of the hypertension outcome was that we were unable to consider those who were  
317 on antihypertensive medication, which could have lowered blood pressure readings at the time of  
318 cohort measurement, and these individuals could have been mis-counted in the non-outcome group.

319 Given our methods explored domains that were derived from combined risk factors, as opposed to  
320 considering these risk factors individually, there is a possibility that our prediction models are over-  
321 adjusted [45]. However, we felt this was unavoidable given our research question was to consider  
322 domains rather than individual risk factors. Further, as we have argued previously, we know that  
323 children's early life experiences are intersecting, and therefore research must explore methods that can  
324 analyse multiple domains simultaneously, as this represents the best approach to disentangle and  
325 understand the role of competing early life domains for future health outcomes. In previous research,  
326 we considered alternative methods to achieve the aims of this paper such as deriving each variable  
327 (within each domain) into a binary (yes/no) outcome, and then summing to produce a count of  
328 adversity within each domain [46]. However, this approach was more limited (than the one presented  
329 here), given we were required to assume that all variables (within each domain), and all domain risk  
330 scores, carried equal weight. Secondly, by deriving variables into a binary indicator we disregarded  
331 information contained within the original data structure and for most variables we had to implement  
332 arbitrary binary cut-off points.

### 333 **Conclusions**

334 We have demonstrated there are early life course domains that are robust predictors of obesity-  
335 hypertension comorbidity across two longitudinal cohorts. There were some differences across



336 cohorts for the antenatal, neonatal, prenatal and birth domain and parental and family environment  
337 domain; we suggest these differences could be due to a cohort effect of the environment in which each  
338 cohort grew up. Overall, shared early life characteristics could have a role in predicting obesity-  
339 hypertension comorbidity, particularly for those who faced socioeconomic disadvantage in early life.  
340 These findings strengthen the case for ensuring public health programmes aimed at giving children  
341 the best start in life continue to be supported.

#### 342 **Conflict of Interest**

343 RKO is a member of the National Institute for Health and Care Excellence (NICE) Technology  
344 Appraisal Committee, member of the NICE Decision Support Unit (DSU), and associate member of  
345 the NICE Technical Support Unit (TSU). She has served as a paid consultant to the pharmaceutical  
346 industry and international reimbursement agencies, providing unrelated methodological advice. She  
347 reports teaching fees from the Association of British Pharmaceutical Industry (ABPI). RBH is a  
348 member of the Scientific Board of the Smith Institute for Industrial Mathematics and System  
349 Engineering.

#### 350 **Author Contributions**

351 S.F., N.A., R.H., S.P., R.O., S.S. and A.B. contributed to the conceptualisation of the MELD-B  
352 project. S.S., N.A., and S.F. obtained the datasets. All authors contributed to the conceptualisation of  
353 the paper. S.S., and N.A. led the design and planning of the paper. R.O. led the design of the statistical  
354 analysis. S.S., N.A., A.B., N.Z., R.H., and R.O. supported the design, planning and reviewing of the  
355 statistical analysis. S.S. performed the statistical analysis with support from N.Z. S.S. prepared all  
356 figures and graphs. S.S., and N.A. produced the initial draft of the manuscript. All authors were  
357 involved in editing and reviewing the manuscript, and approved the final manuscript. S.S., N.A., and  
358 S.F. take responsibility for the data and research governance.

#### 359 **Data Availability Statement**

360 The NCDS datasets generated and analysed in the current study are available from the UK Data  
361 Archive repository (available here: <http://www.cls.ioe.ac.uk/page.aspx?&sitesectionid=795>).

## 362 **Acknowledgement**

363 We would like to acknowledge all other members of the MELD-B Consortium, and we thank the  
364 participants of the NCDS cohort studies.

## 365 **References**

- 366 1. House of Commons Library. Obesity Statistics. 2023.  
367 [https://commonslibrary.parliament.uk/research-](https://commonslibrary.parliament.uk/research-briefings/sn03336/#:~:text=Adult%20obesity%20in%20England,is%20classified%20as%20%27overweight%27)  
368 [briefings/sn03336/#:~:text=Adult%20obesity%20in%20England,is%20classified%20as%20](https://commonslibrary.parliament.uk/research-briefings/sn03336/#:~:text=Adult%20obesity%20in%20England,is%20classified%20as%20%27overweight%27)  
369 [%27overweight%27](https://commonslibrary.parliament.uk/research-briefings/sn03336/#:~:text=Adult%20obesity%20in%20England,is%20classified%20as%20%27overweight%27). Accessed 15 January 2024.
- 370 2. National Health Service Digital. Health Survey for England – Part 2. 2021.  
371 [https://digital.nhs.uk/data-and-information/publications/statistical/health-survey-for-](https://digital.nhs.uk/data-and-information/publications/statistical/health-survey-for-england/2021-part-2/adult-health-hypertension)  
372 [england/2021-part-2/adult-health-hypertension](https://digital.nhs.uk/data-and-information/publications/statistical/health-survey-for-england/2021-part-2/adult-health-hypertension). Accessed 25 March 2024.
- 373 3. Wolin KY, Carson K, Colditz GA. Obesity and cancer. *The Oncologist*. 2010; 15:556–565.
- 374 4. Eckel RH, Kahn SE, Ferrannini E, Goldfine AB, Nathan DM, Schwartz MW, et al. Endocrine  
375 Society, American Diabetes Association, & European Association for the Study of Diabetes  
376 Obesity and type 2 diabetes: what can be unified and what needs to be individualized?.  
377 *Diabetes Care*. 2011; 34:1424–1430.
- 378 5. Powell-Wiley TM, Poirier P, Burke LE, Després JP, Gordon-Larsen P, Lavie CJ, et al. Obesity  
379 and Cardiovascular Disease: A Scientific Statement From the American Heart Association.  
380 *Circulation*. 2021;143: e984–e1010.
- 381 6. Weldegiorgis M, Woodward M. The impact of hypertension on chronic kidney disease and  
382 end-stage renal disease is greater in men than women: a systematic review and meta-analysis.  
383 *BMC Nephrol*. 2024; 21: 506.
- 384 7. World Health Organisation. Obesity. 2021. [https://www.who.int/news-room/facts-in-](https://www.who.int/news-room/facts-in-pictures/detail/6-facts-on-obesity)  
385 [pictures/detail/6-facts-on-obesity](https://www.who.int/news-room/facts-in-pictures/detail/6-facts-on-obesity). Accessed 5 May 2024.

- 386 8. Kario K, Okura A, Hoshide S, Mogi M, et al. The WHO Global report 2023 on hypertension  
387 warning the emerging hypertension burden in globe and its treatment strategy. *Hypertens Res.*  
388 2024; 47:1099–1102.
- 389 9. Leggio M, Lombardi M, Caldarone E, Severi P, D’Emidio S, Armeni M et al. The  
390 relationship between obesity and hypertension: an updated comprehensive overview on  
391 vicious twins. *Hypertens Res.* 2017; 40:947–963.
- 392 10. Tanaka, M. Improving obesity and blood pressure. *Hypertens Res.* 2020; 43:79–89.
- 393 11. Shams E, Kamalumpundi V, Peterson J, Gismondi RA, Oigman W, Correia M. Highlights of  
394 mechanisms and treatment of obesity-related hypertension. *J Hum Hypertens.* 2022; 36:785–  
395 793.
- 396 12. Mokdad AH, Ford ES, Bowman BA, Dietz WH, Vinicor F, Bales VS, et al. Prevalence of  
397 obesity, diabetes, and obesity-related health risk factors, 2001. *JAMA.* 2003; 289(1):76–9.
- 398 13. Natsis M, Antza C, Doundoulakis I, Stabouli S, Kotsis V. Hypertension in Obesity: Novel  
399 Insights. *Curr Hypertens Rev.* 2020; 16(1):30-36.
- 400 14. Alidu H, Owiredu WKBA, Amidu N, Gyasi-Sarpong CK, Dapare PPM, Bawah AT, et al.  
401 Hypertension and obesity comorbidities increases coronary risk, affects domains of sexual  
402 function and sexual quality of life. *Int J Impot Res.* 2018; 30(1):8-13.
- 403 15. Stannard S, Berrington A, Paranjothy S, Owen R, Fraser S, Hoyle R, et al. A conceptual  
404 framework for characterising lifecourse determinants of multiple long-term condition  
405 multimorbidity. *Journal of Multimorbidity and Comorbidity.* 2023;13.. doi:  
406 10.1177/26335565231193951.
- 407 16. Alwan NA, Stannard S, Berrington A, Paranjothy S, Hoyle RB, Owen RK, et al. Risk factors  
408 for ill health: How do we specify what is ‘modifiable’? *PLOS Glob Public Health.* 2024; 4(3):  
409 e0002887.
- 410 17. Stannard S, Berrington A, Fraser SDS, Paranjothy S, Hoyle RB, Owen RK, et al. Mapping  
411 domains of early life determinants of future multimorbidity across three UK longitudinal  
412 cohort studies. *Sci Rep.* 2024; 14(1):21454.

- 413 18. Stannard S, Owen RK, Berrington A, Ziauddeen N, Fraser SDS, Paranjothy S, et al. Exploring  
414 the Relationship Between Early Life Exposures and the Comorbidity of Obesity and  
415 Hypertension: Findings from the 1970 The British Cohort Study (BCS70). MedRxiv. 2024.  
416 Doi: 10.1101/2024.05.13.24307277.
- 417 19. Broom M, Corlett A, Hale S, McCurdy C, Pacitti C. An intergenerational audit for the UK:  
418 2023. Resolution Foundation. 2023; 1-82.
- 419 20. Gomulka J, Stern N. The Employment of Married Women in the United Kingdom 1970-  
420 83. *Economica*. 1990; 57(226):171–199.
- 421 21. Worth E. Women, Education and Social Mobility in Britain during the Long 1970s. *Cultural  
422 and Social History*. 2019; 16(1):67–83.
- 423 22. Mayhew K, Deer C, Dua M. The move to mass higher education in the UK: many questions and  
424 some answers. *Oxford Review of Education*. 2004; 30:65 - 82.
- 425 23. Allen RC. Technical change, globalisation and the labour market: British and American  
426 experience since 1620. In IFS Deaton Review of Inequalities. 2021. Accessed from:  
427 <https://www.ifs.org.uk/inequality/the-interplay-among-wages-technology>. Accessed 15 May  
428 2024.
- 429 24. Fraser SDS, Stannard S, Holland E, Boniface M, Hoyle RB, Wilkinson R, et al.  
430 Multidisciplinary ecosystem to study lifecourse determinants and prevention of early-onset  
431 burdensome multimorbidity (MELD-B) – protocol for a research collaboration. *Journal of  
432 Multimorbidity and Comorbidity*. 2023;13. doi: 10.1177/26335565231204544.
- 433 25. Power C, Elliott J. Cohort profile: 1958 British birth cohort (National Child Development  
434 Study). *Int J Epidemiol*. 2006; 35(1):34-41.
- 435 26. Little RJA, Rubin DB. *Statistical Analysis with Missing Data*. 2nd edition. Hoboken, NJ:  
436 Wiley; 2002.
- 437 27. Horton NJ, Lipsitz SR. Multiple imputation in practice: comparison of software packages for  
438 regression models with missing variables. *American Statistical Association*. 2001; 55:244–  
439 254.
- 440 28. Jakobsen JC, Gluud C, Wetterslev J. When and how should multiple imputation be used for

- 441 handling missing data in randomised clinical trials—a practical guide with flowcharts. BMC  
442 Medical Research Methodology. 2017; 17: 162.
- 443 29. Collins LM, Schafer JL, Kam CM. A Comparison of inclusive and restrictive strategies in  
444 modern missing data procedures. Psychological Methods. 2001; 6:330–351.
- 445 30. Mostafa T, Narayanan M, Pongiglione B. Improving the plausibility of the missing at random  
446 assumption in the 1958 British birth cohort: A pragmatic data driven approach. CLS working  
447 paper number 2020/6. 2020. [https://cls.ucl.ac.uk/wp-content/uploads/2017/02/CLS-working-](https://cls.ucl.ac.uk/wp-content/uploads/2017/02/CLS-working-paper-2020-6-Improving-the-plausibility-of-the-missing-at-random-assumption-in-the-1958-British-birth-cohort-1.pdf)  
448 [paper-2020-6-Improving-the-plausibility-of-the-missing-at-random-assumption-in-the-1958-](https://cls.ucl.ac.uk/wp-content/uploads/2017/02/CLS-working-paper-2020-6-Improving-the-plausibility-of-the-missing-at-random-assumption-in-the-1958-British-birth-cohort-1.pdf)  
449 [British-birth-cohort-1.pdf](https://cls.ucl.ac.uk/wp-content/uploads/2017/02/CLS-working-paper-2020-6-Improving-the-plausibility-of-the-missing-at-random-assumption-in-the-1958-British-birth-cohort-1.pdf). Accessed 20 February 2024.
- 450 31. Centre for Longitudinal Studies. National Child Development Study – Ethical review and  
451 Consent. 2017. [https://cls.ucl.ac.uk/wp-content/uploads/2017/07/NCDS-Ethical-review-and-](https://cls.ucl.ac.uk/wp-content/uploads/2017/07/NCDS-Ethical-review-and-Consent-2014.pdf)  
452 [Consent-2014.pdf](https://cls.ucl.ac.uk/wp-content/uploads/2017/07/NCDS-Ethical-review-and-Consent-2014.pdf). Accessed 1 December 2024.
- 453 32. Haapanen M, Vetrano D, Mikkola T, Calderón-Larrañaga A, Dekhtyar S, Kajantie E, et al.  
454 Early growth, stress, and socioeconomic factors as predictors of the rate of multimorbidity  
455 accumulation across the life course: a longitudinal birth cohort study. The Lancet Healthy  
456 Longevity. 2023; 5:e56 - e65.
- 457 33. Harper S, Lynch J, Smith GD. Social determinants and the decline of cardiovascular diseases:  
458 understanding the links. Annual Review of Public Health. 2011; 32:39-69.
- 459 34. Humphreys J, Jameson K, Cooper C, Dennison E. Early-life predictors of future multi-  
460 morbidity: results from the Hertfordshire Cohort. Age Ageing. 2018; 47(3):474-478.
- 461 35. Johnston MC, Black C, Mercer SW, Prescott GJ, Crilly MA. Impact of educational attainment  
462 on the association between social class at birth and multimorbidity in middle age in the  
463 Aberdeen Children of the 1950s cohort study. BMJ Open. 2019; 9(1):e024048.
- 464 36. Gondek D, Bann D, Brown M, Hamer M, Sullivan A, Ploubidis GB. Prevalence and early-life  
465 determinants of mid-life multimorbidity: evidence from the 1970 British birth cohort. BMC  
466 Public Health. 2021; 21(1):1319.
- 467 37. Furstenberg FF. Fifty Years of Family Change: From Consensus to Complexity. The  
468 ANNALS of the American Academy of Political and Social Science. 2014; 654(1), 12-30.

- 469 38. Kalmijn M. Feeling of Guilt in the Family: The Case of Divorced Parents. In: Mortelmans D  
470 (eds). Divorce in Europe New Insights in Trends, Causes and Consequences of Relation  
471 Break- ups: New Insights in Trends, Causes and Consequences of Relation Breakups.  
472 Springer Open. European Studies of Population, 2020. pp 271-289.
- 473 39. Perelli-Harris B, Styrc M. Mental Well-Being Differences in Cohabitation and Marriage: The  
474 Role of Childhood Selection. *Journal of Marriage and Family*. 2017; 80, 239–255.
- 475 40. Stannard S, Berrington A, Alwan NA. The mediating pathways between parental separation in  
476 childhood and offspring hypertension at midlife. *Scientific reports*. 2022; 12(1):7062.
- 477 41. Perry SE. Fifty Years of Progress in Neonatal and Maternal Transport for Specialty Care. *J*  
478 *Obstet Gynecol Neonatal Nurs*. 2021; 50(6):774-788.
- 479 42. Nuttall FQ. Body Mass Index: Obesity, BMI, and Health. *Nutrition Today*. 2015; 50(3):117-  
480 128.
- 481 43. Holland E, Matthews K, Macdonald S, Ashworth M, Laidlaw L, Cheung KSY et al. The  
482 impact of living with multiple long-term conditions (multimorbidity) on everyday life – a  
483 qualitative evidence synthesis. PREPRINT: Research Square. 2024.
- 484 44. Cheng W, Du Y, Zhang Q, Wang X, He C, He J, et al. Age-related changes in the risk of high  
485 blood pressure. *Frontiers in cardiovascular medicine*. 2022; 9:939103.
- 486 45. Lu H, Cole S, Platt R, Schisterman E. Revisiting Overadjustment Bias. *Epidemiology*. 2021;  
487 32(5):e22-e23.
- 488 46. Abstract from the 2024 Society for Social Medicine and Poupoulation Health Annual  
489 Scientific Meeting. Stannard S, Berrington A, Fraser SDS, Hoyle RB, Paranjothy S, Owen  
490 RK, et al. P03 Domains of early-life risk and obesity-hypertension comorbidity: findings from  
491 two prospective birth cohorts. *J Epidemiol Community Health*. 2024;78:A48.
