1 **Early Life Predictors of Obesity and Hypertension Comorbidity at Midlife: Findings from the**  
2 **1958 National Child Development Study (NCDS)**

3  
4 S Stannard<sup>1</sup>(ORCID: 0000-0002-6139-1020), RK Owen<sup>2</sup> (ORCID: 0000-0001-5977-376X), A  
5 Berrington<sup>3</sup> (ORCID: 0000-0002-1683-6668), N Ziauddeen<sup>1</sup>(ORCID: 0000-0002-8964-5029), SDS  
6 Fraser<sup>1</sup> (ORCID: 0000-0002-4172-4406), S Paranjothy<sup>4</sup>, RB Hoyle<sup>5</sup> (ORCID: 0000-0002-1645-1071),  
7 N A Alwan<sup>1,6,7</sup> (ORCID: 0000-0002-4134-8463)

8  
9 <sup>1</sup>School of Primary Care, Population Sciences and Medical Education, Faculty of Medicine,  
10 University of Southampton, Southampton, United Kingdom

11 <sup>2</sup>Population Data Science, Swansea University Medical School, Faculty of Medicine, Health & Life  
12 Science, Swansea University, Swansea, United Kingdom

13 <sup>3</sup> School of Economic, Social and Political Sciences, University of Southampton, Southampton,  
14 United Kingdom

15 <sup>4</sup>School of Medicine, Medical Sciences and Nutrition, University of Aberdeen

16 <sup>5</sup>School of Mathematical Sciences, University of Southampton, Southampton, United Kingdom

17 <sup>6</sup>University Hospital Southampton NHS Foundation Trust, Southampton, United Kingdom

18 <sup>7</sup>NIHR Applied Research Collaboration Wessex, Southampton, United Kingdom

19 Corresponding Author:

20 Sebastian Stannard - [S.J.Stannard@soton.ac.uk](mailto:S.J.Stannard@soton.ac.uk)

21 University of Southampton, University Road, Southampton, SO17 1BJ, United Kingdom

22 +44(0)23 8059 5000

23

24

## 25 **Abstract**

26 **Background:** Early life exposures can increase the risk of both obesity and hypertension in  
27 adulthood. In this paper we identify exposures across five pre-hypothesised childhood domains,  
28 explore them as predictors of obesity and hypertension comorbidity using the 1958 National Child  
29 Development Study (NCDS), and discuss these results in comparison to a similar approach using  
30 another birth cohort (the 1970 British Cohort Study (BCS70)).

31 **Methods:** The analytical sample included 9150 participants. The outcome was obesity (BMI of  $\geq 30$ )  
32 and hypertension (blood pressure  $> 140/90$  mm Hg) comorbidity at age 44. Domains included:  
33 ‘prenatal, antenatal, neonatal and birth’, ‘developmental attributes and behaviour’, ‘child education  
34 and academic ability’, ‘socioeconomic factors’ and ‘parental and family environment’. Stepwise  
35 backward elimination selected variables for inclusion for each domain, and predicted risk scores of  
36 obesity-hypertension for each cohort member within each domain were calculated. We performed  
37 multivariable logistic regression analysis including domain-specific risk scores, sex and ethnicity to  
38 assess how well the outcome could be predicted taking all domains into account. In additional  
39 analysis we included potential adult factors.

40 **Results:** Including all domain-specific risk scores, sex, and ethnicity in the same prediction model the  
41 area under the curve was 0.70 (95%CI 0.67-0.72). The strongest domain predictor for obesity-  
42 hypertension comorbidity was for the socioeconomic factors domain (OR 1.28 95%CI 1.18-1.38),  
43 similar to the BCS70 results. However, the parental and family environment domain was not a  
44 significant predictor for obesity-hypertension comorbidity (OR 1.08 95%CI 0.94-1.24) unlike the  
45 BCS70 results. After considering adult predictors, robust associations remained to the socioeconomic,  
46 education and academic abilities, development and behaviour, and prenatal, antenatal, neonatal and  
47 birth domains.

48 **Conclusions:** In the NCDS some early life course domains were found to be significant predictors of  
49 obesity-hypertension comorbidity, supporting previous findings. Shared early-life characteristics

could have a role in predicting obesity-hypertension comorbidity, particularly for those who faced socioeconomic disadvantage.

## Introduction

In England an estimated 26% of adults have obesity (body mass index  $30\text{kg/m}^2$  or over) [1] and 31% of adults have hypertension (blood pressure over 140/90mm Hg) [2]. Both conditions are associated with further morbidities including Type 2 diabetes, heart disease, kidney disease, renal disease, strokes, and some cancers, including breast and bowel cancer [3-6]. Globally, both conditions represent a major public health problem. The World Health Organisation (WHO) estimates that 2.8 million deaths every year are attributed to overweight or obesity [7]. Hypertension prevalence has increased between 41-144% across WHO regions over the past 30 years [8]. Research has also demonstrated that obesity and hypertension often co-occur [9,10]. For example, around half of hypertensive patients in the US have obesity [11], and individuals with obesity are 3.5 times more likely to have hypertension compared to normal weight individuals [12,13]. The co-occurrence of both conditions also increases the risk of further morbidity including cardiovascular disease, sexual dysfunction, poor quality of life and mortality [13,14].

It is important to consider risk exposures to subsequent morbidity in terms of multiple domains (i.e., a group of variables that represent an overarching theme) for three reasons. First, this provides a combined exposure measure that reflects multiple variables in the data rather than performing multiple statistical testing using single components in relation to the study outcomes. Second, conceptualising the components within wider early life domains provides a more holistic reflection of the childhood conditions in which the cohort member grew up. Third, considering early life risk in domains may better inform interventions and policy in childhood as incorporating information from multiple early life domains into the same analysis may help us understand the combined effects of different experiences across a range of early life domains on developing long-term conditions. This can provide actionable insights into developing interventions in childhood that may help support people to live longer in good health.

76

77 In previous research [15], we developed a conceptual framework to characterise the population-level  
78 domains of early-life determinants of future multimorbidity risk. Through a scoping literature and  
79 policy review, and with the support of public and patient contributors, 12 domains of early-life risk  
80 factors of future multimorbidity risk were identified [15]. These domains covered a range of social,  
81 economic, developmental, educational and environmental factors that focused on both direct and  
82 indirect factors as well as wider systemic and structural determinants of disease and health  
83 inequalities [15,16]. Subsequent research [17] explored how these 12 domains of early-life risk factors  
84 of future multimorbidity risk could be characterised across UK birth cohort studies including the 1958  
85 National Child Development Study (NCDS).

86

87 In a previous paper we used the 1970 British Cohort Study (BCS70) to consider five early life  
88 domains, chosen because they showed unadjusted associations with obesity and hypertension  
89 comorbidity at age 46 [18]. Results indicated all five domains were significant predictors for obesity-  
90 hypertension comorbidity, with the strongest domain predictors being the parental and family  
91 environment domain and the socioeconomic factors domain [18]. After including adult predictors, the  
92 most robust domains for predicting obesity-hypertension included the parental and family  
93 environment domain, socioeconomic factors domain and education and academic ability [18].

94 In this analysis, we aimed to apply the same methodological approach to the NCDS cohort. Although  
95 the two cohorts are only 12 years apart, the childhood conditions the members of each cohort grew up  
96 in are arguably different. The younger cohort (BCS70) experienced rising women's employment and  
97 economic independence, decreased family stability, educational expansion and a shift away from the  
98 male breadwinner nuclear family that dominated the family structure of the NCDS cohort [19-23].

99 The younger cohort (BCS70) also experienced generational pay progression, higher real household  
100 disposable incomes and an increase in home ownerships [19], but globalisation and a shift of income  
101 from labour to capital meant greater economic uncertainty and increased inequality [23]. Therefore,  
102 these factors might lead us to expect more heterogeneity in the early life experiences of the 1970  
103 cohort compared to the 1958 cohort.

In this study, we aimed to explore the extent to which the same five early life course domains predict the outcome of obesity-hypertension comorbidity. To achieve this while weighting the components of each domain, we also produced -as a first stage of the analysis- predicted risk scores of the outcome for each of the five pre-defined early life domains. In the discussions we consider the results presented here in relation to a previous analysis of the BCS70 cohort [18]. This work forms part of a larger aim to model targeted multimorbidity prevention scenarios as part of the Multidisciplinary Ecosystem to study Lifecourse Determinants and Prevention of Early-onset Burdensome Multimorbidity (MELD-B) project [24].

## **Methods**

### ***Datasets***

We used the 1958 National Child Development Study (NCDS) [25] that has followed children born in England, Scotland and Wales in one week in 1958, and includes 17415 cohort members. The comorbidity outcome of obesity and hypertension was measured in a biomedical sweep at age 44. All other variables were measured either at birth or at the age 11 sweep.

### ***Outcome***

The outcome was a combined obesity-hypertension phenotype at age 44. Blood pressure was measured via three systolic and diastolic blood pressure readings during a single appointment from a research nurse. Hypertension was defined as average blood pressure reading of over 140/90 mm Hg. BMI was calculated via height and weight measurements taken during the same nurse appointment, and calculated using the following formula:  $BMI = \text{weight (kg)} / \text{height (m)}^2$ . Obesity was defined as a BMI of 30kg/m<sup>2</sup> or over. The obesity-hypertension comorbidity variable was considered as a binary (no/yes) variable.

### ***Exposures (Five pre-hypothesised domains)***

We focus on five domains because they showed unadjusted association with the outcome in this paper and in the previous research based on the BCS70 cohort [18], and Supplementary Materials Table 1 includes all the variables that were considered for each domain:

1. *Prenatal, antenatal, neonatal and birth domain* focused on the period from conception to the onset of labour, the circumstances and outcomes surrounding a birth, and the period immediately following birth.
2. *Developmental attributes and behaviour domain* focused on the developmental markers of children relating to cognition, coordination, personality types and behavioural traits.
3. *Child education and academic ability domain* related to the process of learning and educational achievement, especially in educational settings, and the knowledge an individual gains from these educational institutions.
4. *Socioeconomic factors domain* included factors relating to differences between individuals or groups of people caused mainly by their social and economic situation.
5. *Parental and family environment domain* incorporated the interactions between children and care givers, parenting styles, parental beliefs, attitudes and discipline, and wider family factors such as kin networks.

#### ***Analytical sample***

The analytical sample included all cohort members who had measured height, weight, and blood pressure at age 44 ( $n = 9150/17415$ ). Multiple imputation was used to maintain sample size and reduce bias in the estimates due to missing data. Multiple imputation was conducted by chained equations for missing observations at birth, age 11, and 44 [26]. 50 imputation cycles were constructed under the missing-at-random assumption [27-29], which has been found to be highly plausible in the British birth cohorts [30]. All variables were included in the imputation process. The outcome was included in the imputed models, but imputed outcome values were not used.

#### ***Statistical analysis***

We used the same methodological approach followed to examine five early-life domains as predictors of obesity-hypertension comorbidity in the BCS70 cohort, and full details of this method can be found elsewhere [18]. However, we provide a summary of those methods here.

Firstly, stepwise backward elimination conducted on multiple imputed data, was used to select variables for inclusion separately for each domain. Secondly, logistic regression models then explored the relationship between retained variables following stepwise backwards elimination and odds of obesity-hypertension comorbidity. From this regression modelling the predicted risk scores of the obesity-hypertension comorbidity outcome for each cohort member within each domain were then calculated. Thirdly, we used logistic regression modelling including all five domain-specific risk scores, and added sex (determined at birth by the presence or absence of a Y chromosome), and ethnicity to predict the obesity-hypertension comorbidity outcome. The area under curve statistic was used to assess the predictive performance of this model. The odds ratios of the five domains within this model were used to identify the strongest domains that acted as predictors for obesity and hypertension comorbidity taking into account the effect of the other domains. Finally, we repeated the previous step this time with the inclusion of adult factors that are potentially linked to both the exposures and the outcome. These were recorded at age 44 and included marital status, self-rated financial difficulty, the age the cohort member left education, smoking status, frequency of consuming alcoholic drinks, frequency of consuming fresh fruit, frequency of exercising and occupational social class.

## **Ethical Approval**

Ethics approval for MELD-B was obtained from the University of Southampton Faculty of Medicine Ethics committee (ERGO II Reference 66810). A full review of ethics and consent for the NCDS study is provided by the Centre for Longitudinal Studies and can be found elsewhere [31].

## **Results**

*Step 1: Stepwise backwards elimination to select variables for inclusion separately for each domain.*

Table 1 identifies the retained variables following stepwise backwards elimination for each domain in relation to the outcome of obesity-hypertension comorbidity at age 44. Amongst the 9150 cohort members at age 44, 4% (n=395) had obesity-hypertension comorbidity. Considering the individual prevalence, 24% of the cohort members at age 44 had obesity (n=2235/9150) and 11% had hypertension (n=1049/9150). For the prenatal, antenatal, neonatal and birth domain, the retained variables following stepwise backwards elimination focused on the health of the cohort member at birth (illness, resuscitation and admission to hospital). For the developmental attributes and behaviour domain, retained variables considered developmental markers of the cohort members (coordination and balance), whilst father's social class was retained within the socioeconomic factors domain. For the child education and academic ability domain, retained variables were related to academic ability (general ability test, general knowledge assessment and oral ability assessment), and for the parental and family environment domain, retained variables focused on fathers' interest in their child's education and engaging in family activities (family walks).

*Table 1. Step 1: Variables retained in the five domain risk scores following stepwise backwards elimination, and prevalence of combined obesity-hypertension at age 44.*

|                                                                                     |                              |                                  | <b>Obesity and hypertension</b> |                 |                              |
|-------------------------------------------------------------------------------------|------------------------------|----------------------------------|---------------------------------|-----------------|------------------------------|
|                                                                                     |                              |                                  | No<br>N<br>(%)                  | Yes<br>N<br>(%) | Total<br>Sample <sup>1</sup> |
| <b>Prenatal, antenatal, neonatal and birth domain (variables recorded at birth)</b> | Child resuscitation at birth | No                               | 7934<br>95.7%                   | 357<br>4.3%     | 8291                         |
|                                                                                     |                              | Yes                              | 158<br>92.4%                    | 13<br>7.6%      | 171                          |
|                                                                                     | Hospital admission at birth  | No admission                     | 6549<br>96.0%                   | 273<br>4.0%     | 6833                         |
|                                                                                     |                              | Admission for toxemia            | 562<br>92.7%                    | 55<br>7.2%      | 606                          |
|                                                                                     |                              | Admission for other condition(s) | 975<br>95.3%                    | 48<br>4.7%      | 1023                         |
|                                                                                     | Baby illness at birth        | No illness                       | 7840<br>95.7%                   | 352<br>4.3%     | 8192                         |
|                                                                                     |                              | Illness                          | 207<br>92.8%                    | 16<br>7.2%      | 223                          |
|                                                                                     | Poor physical coordination   | Not at all                       | 6311<br>95.7%                   | 284<br>4.3%     | 6595                         |
|                                                                                     |                              | Somewhat                         | 870<br>94.8%                    | 48<br>5.2%      | 918                          |
| <b>Developmental attributes and behaviour domain (variables</b>                     |                              | Certainly applies                | 134                             | 10              |                              |



|                                                                            |                                         |                                      |       |             |      |
|----------------------------------------------------------------------------|-----------------------------------------|--------------------------------------|-------|-------------|------|
| recorded at age 11)                                                        | Standing heel to toe                    | Very steady                          | 93.1% | 6.9%        | 144  |
|                                                                            |                                         |                                      | 3807  | 150         |      |
|                                                                            |                                         |                                      | 96.2% | 3.8%        | 3957 |
|                                                                            |                                         | Slightly unsteady                    | 2667  | 140         |      |
|                                                                            |                                         |                                      | 95.1% | 5.0%        | 2807 |
| Socioeconomic factors domain (variables recorded at age 11)                | Fathers social class                    | Very unsteady                        | 587   | 37          |      |
|                                                                            |                                         |                                      | 94.1% | 5.9%        | 624  |
|                                                                            |                                         | I                                    | 460   | 11          |      |
|                                                                            |                                         |                                      | 97.7% | 2.3%        | 471  |
|                                                                            |                                         | II                                   | 1451  | 39          |      |
|                                                                            |                                         |                                      | 97.5% | 2.6%        | 1490 |
|                                                                            |                                         | III (non-manual)                     | 742   | 28          |      |
|                                                                            |                                         |                                      | 96.4% | 3.6%        | 770  |
|                                                                            |                                         | III (manual)                         | 3026  | 159         |      |
|                                                                            |                                         |                                      | 95.0% | 5.0%        | 3185 |
| Child education and academic ability domain (variables recorded at age 11) | General knowledge – teachers assessment | IV (non-manual)                      | 138   | 12          |      |
|                                                                            |                                         |                                      | 92.0% | 8.0%        | 150  |
|                                                                            |                                         | IV (manual)                          | 1085  | 56          |      |
|                                                                            |                                         |                                      | 95.1% | 4.9%        | 1141 |
|                                                                            |                                         | V                                    | 359   | 30          |      |
|                                                                            | Oral ability – teachers assessment      |                                      | 92.3% | 7.7%        | 389  |
|                                                                            |                                         | Exceptional                          | 2209  | 82          |      |
|                                                                            |                                         |                                      | 96.4% | 3.6%        | 2291 |
|                                                                            |                                         | Above average                        | 3456  | 170         |      |
|                                                                            |                                         |                                      | 95.3% | 4.7%        | 3626 |
| General ability test score                                                 | Average and below                       | 95.1%                                | 97    |             |      |
|                                                                            |                                         |                                      | 4.9%  | 1977        |      |
|                                                                            | Exceptional                             | 1995                                 | 60    |             |      |
|                                                                            |                                         | 97.1%                                | 2.9%  | 2055        |      |
|                                                                            | Above average                           | 4214                                 | 208   |             |      |
| Parental and family environment domain (variables recorded at age 11)      | Family walks                            |                                      | 95.3% | 4.7%        | 4422 |
|                                                                            |                                         | Average and below                    | 1336  | 81          |      |
|                                                                            |                                         |                                      | 94.3% | 5.7%        | 1417 |
|                                                                            |                                         | No obesity-hypertension – mean (SD)  |       | 45.7 (15.3) | 7587 |
|                                                                            |                                         | Yes obesity-hypertension – mean (SD) |       | 42.0 (15.7) | 347  |
|                                                                            | Father’s interest in child’s education  | Most weeks                           | 4057  | 172         |      |
|                                                                            |                                         |                                      | 96.1% | 3.9%        | 4229 |
|                                                                            |                                         | Occasionally                         | 2966  | 150         |      |
|                                                                            |                                         |                                      | 95.2% | 4.8%        | 3116 |
|                                                                            |                                         | Hardly ever                          | 386   | 27          |      |
|                                                                            |                                         | 93.5%                                | 6.5%  | 413         |      |
| Very interested                                                            |                                         | 3232                                 | 124   |             |      |
|                                                                            |                                         | 96.3%                                | 3.7%  | 3356        |      |
| Some interest                                                              |                                         | 2539                                 | 134   |             |      |
|                                                                            | 95.0%                                   | 5.0%                                 | 2673  |             |      |
| Little interest                                                            |                                         | 862                                  | 48    |             |      |
|                                                                            |                                         | 94.7%                                | 5.3%  | 910         |      |
|                                                                            | Can’t say/no father                     | 780                                  | 39    |             |      |
|                                                                            |                                         | 95.2%                                | 4.8%  | 819         |      |

194 <sup>1</sup>The total sample size was based on the specific sample available at the sweep in which the variable  
195 was reported or measured.

*Step 2: Predicted risk scores of obesity-hypertension comorbidity for each cohort member within each domain.*

In Supplementary Materials Table 3-7, we include the regression coefficients of obesity-hypertension for the logistic regression models that explored the relationship between retained variables following stepwise backwards elimination (step 1) and obesity-hypertension comorbidity, and for each domain separately. In Supplementary Materials 2, we present a Pearson correlation matrix exploring correlation across domains. The strongest correlations were between the parental and family environment domain and child education and academic ability domain (coefficient 0.31) and between the parental and family environment domain and socioeconomic factors domain (coefficient 0.29). These results suggest that the domain-specific risk scores were not collinear.

*Step 3: A prediction model including five domain-specific risk scores, sex and ethnicity.*

The area under curve (AUC) for the prediction model that included all five domain-specific risk scores (produced in step 2), ethnicity, and sex was 0.70 (95%CI 0.67-0.72). Table 2 presents the odds ratios of obesity-hypertension at age 44 for the prediction model that included all five domain-specific risk scores (produced in step 2), sex, and ethnicity. As shown, the parental and family environment domain was not a significant predictor of obesity-hypertension comorbidity (OR 1.08 95%CI 0.94-1.24). All other domains were predictors of obesity-hypertension comorbidity, with the strongest domain predictor being the socioeconomic factors domain (OR 1.28 95%CI 1.19-1.38).

*Table 2. Step 3: Odds ratios of obesity-hypertension at age 46 in relation to domain-specific risk score of obesity-hypertension for five early life domains. Multiple imputed data (50 Imputations).*

|                                                | Odds ratios | 95% Confidence interval |
|------------------------------------------------|-------------|-------------------------|
| Developmental attributes and behaviour domain  | <b>1.20</b> | <b>1.06 - 1.36</b>      |
| Prenatal, antenatal, neonatal and birth domain | <b>1.21</b> | <b>1.11 - 1.31</b>      |
| Parent and family environment domain           | 1.08        | 0.94 - 1.24             |
| Education and academic ability domain          | <b>1.12</b> | <b>1.02 - 1.23</b>      |

|                                           |             |                    |
|-------------------------------------------|-------------|--------------------|
| Socioeconomic factors domain              | <b>1.28</b> | <b>1.19 - 1.38</b> |
| Child's sex: Women (base – men)           | <b>0.38</b> | <b>0.64 - 0.91</b> |
| Mother ethnic group: Other (base – white) | 1.37        | 0.86 - 2.21        |
| Number of observations                    |             | 9150               |

216 *Significant findings highlighted in bold.*

217 *Step 4: A prediction model including five domain-specific risk scores, sex, ethnicity and potential*  
 218 *adult predictors.*

219 Including adult factors in the model, the AUC increased to 0.73 (95%CI 0.71-0.76). Table 3 presents  
 220 the odds ratios of obesity-hypertension at age 44 for this prediction model that included all five  
 221 domain specific risk scores (produced in step 2) ethnicity, sex and adult factors. As shown, after the  
 222 inclusion of adult factors, the prenatal, antenatal, neonatal and birth domain was not a significant  
 223 predictor of obesity-hypertension comorbidity (OR 1.08 95%CI 0.94-1.25). All the other four domains  
 224 remained robust predictors for obesity and hypertension comorbidity, with the strongest domain  
 225 predictor for obesity and hypertension comorbidity remaining as the socioeconomic factors domain  
 226 (OR 1.29 95%CI 1.19-1.39).

227 *Table 4. Step 4: Odds ratios of obesity-hypertension at age 46 in relation to domain-specific risk score*  
 228 *of obesity-hypertension for five early life domains including adult predictors. Multiple imputed data*  
 229 *(50 Imputations).*

|                                                | OR          | 95% Confidence Interval |
|------------------------------------------------|-------------|-------------------------|
| Developmental attributes and behaviour domain  | <b>1.19</b> | <b>1.05 - 1.35</b>      |
| Prenatal, antenatal, neonatal and birth domain | <b>1.20</b> | <b>1.11 - 1.30</b>      |
| Parent and family environment domain           | 1.08        | 0.94 - 1.25             |
| Education and academic ability domain          | <b>1.13</b> | <b>1.03 - 1.25</b>      |
| Socioeconomic factors domain                   | <b>1.29</b> | <b>1.19 - 1.39</b>      |
| Child's sex: Women (base – men)                | <b>0.42</b> | <b>0.32 - 0.54</b>      |
| Mother ethnic group: Other (base – white)      | 1.44        | 0.88 - 2.33             |
| Smoking: Used to smoke (base – Never smoked)   | 0.93        | 0.73 – 1.19             |

|                                                            |             |                    |
|------------------------------------------------------------|-------------|--------------------|
| Occasionally smokes                                        | <b>0.40</b> | <b>0.19 – 0.83</b> |
| Regularly smokes                                           | <b>0.59</b> | <b>0.42 - 0.76</b> |
| Marital status: Cohabiting (base – Married)                | <b>0.53</b> | <b>0.33 – 0.84</b> |
| Single never married                                       | 1.12        | 0.78 – 1.60        |
| Separated/divorced                                         | 0.77        | 0.52 – 1.16        |
| Alcohol consumption: Most days (base – Occasionally)       | <b>1.23</b> | <b>1.10 - 2.54</b> |
| 2 to 3 days a week                                         | 1.31        | 0.88 – 1.95        |
| Once a week                                                | 1.02        | 0.66 – 1.57        |
| 2 to 3 times a month                                       | <b>1.88</b> | <b>1.20 – 2.93</b> |
| Never                                                      | 1.17        | 0.63 – 2.14        |
| Social class: Lower managerial (base - higher managerial)  | 1.64        | 0.89 - 3.02        |
| Skilled manual                                             | 1.34        | 0.67 – 2.65        |
| Skilled non-manual                                         | 1.77        | 0.93 – 3.37        |
| Partly-skilled                                             | 1.51        | 0.74 – 3.01        |
| Unskilled                                                  | 1.11        | 0.43 – 2.86        |
| Unemployed                                                 | 1.65        | 0.80 – 3.39        |
| Days exercise per week: 4-5 days (base – every day)        | 1.38        | 0.88 – 2.16        |
| 2-3 days                                                   | 1.32        | 0.91 – 1.94        |
| Once a week                                                | 1.21        | 0.81 – 1.80        |
| 2-3 times a month                                          | 1.60        | 0.98 – 2.60        |
| Less often                                                 | <b>1.67</b> | <b>1.17 – 2.38</b> |
| Fruit consumption: every day (base – more than once a day) | 1.18        | 0.85 - 1.61        |
| 3-6 days a week                                            | 1.31        | 0.89 - 1.90        |
| 1-2 days a week                                            | 1.05        | 0.72 - 1.51        |
| Less than once a week                                      | <b>1.63</b> | <b>1.03 – 2.58</b> |
| Occasionally                                               | 1.04        | 0.69 - 1.57        |
| Never                                                      | <b>1.87</b> | <b>1.01 – 3.44</b> |
| Managing financially: doing all right (base - doing well)  | 0.82        | 0.64 - 1.06        |
| Just about getting by                                      | 0.96        | 0.72 - 1.29        |
| Finding it quite difficult                                 | 0.98        | 0.60 – 1.62        |
| Finding it very difficult                                  | 0.73        | 0.31 – 1.72        |
| Age left education                                         | 0.97        | 0.62 - 1.04        |
| Number of observations                                     |             | 9150               |

230 *Significant findings highlighted in bold.*

## 231 **Discussion**

232 Using the NCDS birth cohort dataset, and considering five early life domains concurrently, the  
233 strongest domain predictor for obesity-hypertension comorbidity was the socioeconomic factors  
234 domain, even after accounting for socioeconomic factors during adulthood. Results suggested that the  
235 parental and family environment domain was not a significant predictor for obesity-hypertension  
236 comorbidity in adulthood. The inclusion of adult factors slightly improved the predictive performance  
237 of the models, however robust associations remained to the development and behaviour, the  
238 socioeconomic factors, education and academic abilities and prenatal, antenatal, neonatal and birth  
239 domains.

240 Our aim in this paper was to use the same methodological approach that has already been applied to  
241 the BCS70 cohort [18] to explore the relationship between five early life domains and obesity-  
242 hypertension comorbidity, and then compare results across the two cohort studies. We found that the  
243 results presented here were largely comparable to our previous findings based on the BCS70 cohort  
244 [18], in particular there was consistency with regards to the robustness of the socioeconomic factors  
245 domain as a predictor for obesity-hypertension comorbidity across both papers [18]. Significantly, the  
246 socioeconomic factors domain (in childhood) remained an important predictor even after accounting  
247 for socioeconomic factors during adulthood. This adds to a body of literature that has found childhood  
248 socioeconomic factors to be associated to multimorbidity later in the life course [32-36], and provides  
249 further justification for interventions targeting socioeconomic conditions in childhood as this might  
250 have the biggest impact on improving certain health outcomes later in the life course. The findings  
251 that the socioeconomic domain remains important across cohorts is significant given the BCS70  
252 cohort (born 1970) were exposed to better economic conditions including higher employment rates  
253 particularly for women, generational pay progression, higher real household disposable incomes and  
254 an increase in home ownerships [19].

255 Overall, the AUC statistics suggested that for both models (including and excluding adult predictors),  
256 variables within the NCDS cohort had a stronger predictive power than variables within the BCS70

cohort. Odds ratios (across all models) in the NCDS cohort were also larger than in the BCS70 cohort. Further, after considering the role of adult predictors, more robust associations between early life domains and hypertension and obesity comorbidity remained in the NCDS cohort compared to the BCS70 cohort. These three factors may indicate that obesity-hypertension comorbidity is more closely related to the domain-specific risk scores in the NCDS compared to the BCS70.

For the BCS70 cohort, the parental and family environment domain was a robust predictor of obesity-hypertension, but in the NCDS cohort, it was not a predictor. One explanation for this difference is the wider demographic and social context of the parental-family environment in which each cohort grew up. For the NCDS cohort (born 1958), most children grew up in households dominated by a stable nuclear-family model [37]. However, the BCS70 cohort (born 1970) grew up during a period of rapid change within the parental-family environment. The liberalisation of divorce laws coupled with changing attitudes and norms relating to marriage were reflected in a sharp rise in divorce rates and a decline in first marriage rates from the 1970s onwards [38,39]. The BCS70 cohort grew up during a period of increasing rates of parental partnership dissolution, single parent households and a rise in children living with non-biological parents and non-full siblings, and this is reflected by the retained variables following stepwise backwards elimination (step 1 of the analysis). Specifically the BCS70, unlike the NCDS, retained variables relating to the father of the cohort member including father figure and if the father helps manage the cohort member. Therefore, it could be hypothesised that the impact of these rapid changes to the parental-family environment, particularly around the role of fathers, had a greater impact on the BCS70 cohort compared to the NCDS who were less exposed to these changes. This is demonstrated in a paper that found women in the BCS70 who experienced parental separation were more like to have hypertension at age 46, compared to those who had not experienced a parental separation in childhood [40].

A further cohort effect is within the antenatal, neonatal, prenatal and birth domain which was a robust predictor of obesity-hypertension comorbidity in the NCDS cohort but not in the BCS70 cohort. It is likely that even over this short 12-year period, obstetric, neonatal and speciality care for ill infants will have improved [41], thus potentially reducing the impact of antenatal, neonatal, prenatal and birth

adversity in the younger cohort (BCS70). Another difference between the antenatal, neonatal, prenatal and birth domain was that the stepwise backwards selection (step 1 of the analysis) retained different variables. The variables retained in the NCDS cohort focused on the health of the child at birth whereas, for the BCS70 cohort, the retained variables focussed on factors relating to maternal fertility history and maternal health behaviours during pregnancy.

In the NCDS the prevalence of obesity, hypertension and combined hypertension-obesity was lower than observed in the BCS70 cohort [18], suggesting that those with the outcome in the NCDS cohort may be a more select group of individuals. However, given that blood pressure increases with age [42] and that the BCS70 cohort were slightly older than the NCDS cohort at outcome data collection, it is important to note this relationship between blood pressure and age might explain some of the increased prevalence of obesity-hypertension amongst the older BCS70 cohort. In the BCS70 study we additionally classified hypertension if a participant had received a doctor's diagnosis of high blood pressure or hypertension at age 46 (self-reported) even if the blood pressure measurement was less than 140/90 mm Hg, to account for those who may have had a lower blood pressure reading due to hypertension medication. In the NCDS self-reported hypertension was not asked.

There are a number of important next steps. We have identified robust domains that predict obesity-hypertension comorbidity, the next step therefore could include modelling prevention scenarios within these domains to better inform policy to help people live in better health for longer. Secondly, it is important to expand the methods presented here to consider the relationship to other multimorbidity clusters and outcomes that develop a more sophisticated understanding of multimorbidity, including focussing on burdensomeness and complexity for example incorporating eight themes of 'work' burden for those living with multimorbidity [43].

### ***Strengths and limitations***

The NCDS dataset allowed us to explore a wide array of social, environmental, and family variables in childhood to represent five early-life domains. The data also afforded the opportunity to analyse

potential adult predictors and objective measures of both obesity and hypertension measured at midlife.

A limitation of the NCDS cohort was the significant under-representation of individuals from non-white ethnic backgrounds and therefore the cohort does not reflect the ethnic diversity of the British population today. Further using BMI (to indicate obesity) is limited given the established research that has demonstrated the measure risks overestimating body fat in those who have muscular builds [44]. Another limitation of the hypertension outcome was that we were unable to consider those who were on antihypertensive medication, which could have lowered blood pressure readings at the time of cohort measurement, and these individuals could have been mis-counted in the non-outcome group.

Given our methods explored domains that were derived from combined risk factors, as opposed to considering these risk factors individually, there is a possibility that our prediction models are over-adjusted [45]. However, we felt this was unavoidable given our research question was to consider domains rather than individual risk factors. Further, as we have argued previously, we know that children's early life experiences are intersecting, and therefore research must explore methods that can analyse multiple domains simultaneously, as this represents the best approach to disentangle and understand the role of competing early life domains for future health outcomes. In previous research, we considered alternative methods to achieve the aims of this paper such as deriving each variable (within each domain) into a binary (yes/no) outcome, and then summing to produce a count of adversity within each domain [46]. However, this approach was more limited (than the one presented here), given we were required to assume that all variables (within each domain), and all domain risk scores, carried equal weight. Secondly, by deriving variables into a binary indicator we disregarded information contained within the original data structure and for most variables we had to implement arbitrary binary cut-off points.

## **Conclusions**

We have demonstrated there are early life course domains that are robust predictors of obesity-hypertension comorbidity across two longitudinal cohorts. There were some differences across



cohorts for the antenatal, neonatal, prenatal and birth domain and parental and family environment domain; we suggest these differences could be due to a cohort effect of the environment in which each cohort grew up. Overall, shared early life characteristics could have a role in predicting obesity-hypertension comorbidity, particularly for those who faced socioeconomic disadvantage in early life. These findings strengthen the case for ensuring public health programmes aimed at giving children the best start in life continue to be supported.

### **Conflict of Interest**

RKO is a member of the National Institute for Health and Care Excellence (NICE) Technology Appraisal Committee, member of the NICE Decision Support Unit (DSU), and associate member of the NICE Technical Support Unit (TSU). She has served as a paid consultant to the pharmaceutical industry and international reimbursement agencies, providing unrelated methodological advice. She reports teaching fees from the Association of British Pharmaceutical Industry (ABPI). RBH is a member of the Scientific Board of the Smith Institute for Industrial Mathematics and System Engineering.

### **Author Contributions**

S.F., N.A., R.H., S.P., R.O., S.S. and A.B. contributed to the conceptualisation of the MELD-B project. S.S., N.A., and S.F. obtained the datasets. All authors contributed to the conceptualisation of the paper. S.S., and N.A. led the design and planning of the paper. R.O. led the design of the statistical analysis. S.S., N.A., A.B., N.Z., R.H., and R.O. supported the design, planning and reviewing of the statistical analysis. S.S. performed the statistical analysis with support from N.Z. S.S. prepared all figures and graphs. S.S., and N.A. produced the initial draft of the manuscript. All authors were involved in editing and reviewing the manuscript, and approved the final manuscript. S.S., N.A., and S.F. take responsibility for the data and research governance.

### **Data Availability Statement**

The NCDS datasets generated and analysed in the current study are available from the UK Data Archive repository (available here: <http://www.cls.ioe.ac.uk/page.aspx?&siteid=795>).

## Acknowledgement

We would like to acknowledge all other members of the MELD-B Consortium, and we thank the participants of the NCDS cohort studies.

## References

1. House of Commons Library. Obesity Statistics. 2023. <https://commonslibrary.parliament.uk/research-briefings/sn03336/#:~:text=Adult%20obesity%20in%20England,is%20classified%20as%20%27overweight%27>. Accessed 15 January 2024.
2. National Health Service Digital. Health Survey for England – Part 2. 2021. <https://digital.nhs.uk/data-and-information/publications/statistical/health-survey-for-england/2021-part-2/adult-health-hypertension>. Accessed 25 March 2024.
3. Wolin KY, Carson K, Colditz GA. Obesity and cancer. *The Oncologist*. 2010; 15:556–565.
4. Eckel RH, Kahn SE, Ferrannini E, Goldfine AB, Nathan DM, Schwartz MW, et al. Endocrine Society, American Diabetes Association, & European Association for the Study of Diabetes. Obesity and type 2 diabetes: what can be unified and what needs to be individualized?. *Diabetes Care*. 2011; 34:1424–1430.
5. Powell-Wiley TM, Poirier P, Burke LE, Després JP, Gordon-Larsen P, Lavie CJ, et al. Obesity and Cardiovascular Disease: A Scientific Statement From the American Heart Association. *Circulation*. 2021;143: e984–e1010.
6. Weldegiorgis M, Woodward M. The impact of hypertension on chronic kidney disease and end-stage renal disease is greater in men than women: a systematic review and meta-analysis. *BMC Nephrol*. 2024; 21: 506.
7. World Health Organisation. Obesity. 2021. <https://www.who.int/news-room/facts-in-pictures/detail/6-facts-on-obesity>. Accessed 5 May 2024.

8. Kario K, Okura A, Hoshida S, Mogi M, et al. The WHO Global report 2023 on hypertension warning the emerging hypertension burden in globe and its treatment strategy. *Hypertens Res.* 2024; 47:1099–1102.
9. Leggio M, Lombardi M, Caldarone E, Severi P, D’Emidio S, Armeni M et al. The relationship between obesity and hypertension: an updated comprehensive overview on vicious twins. *Hypertens Res.* 2017; 40:947–963.
10. Tanaka, M. Improving obesity and blood pressure. *Hypertens Res.* 2020; 43:79–89.
11. Shams E, Kamalumpundi V, Peterson J, Gismondi RA, Oigman W, Correia M. Highlights of mechanisms and treatment of obesity-related hypertension. *J Hum Hypertens.* 2022; 36:785–793.
12. Mokdad AH, Ford ES, Bowman BA, Dietz WH, Vinicor F, Bales VS, et al. Prevalence of obesity, diabetes, and obesity-related health risk factors, 2001. *JAMA.* 2003; 289(1):76–9.
13. Natsis M, Antza C, Doundoulakis I, Stabouli S, Kotsis V. Hypertension in Obesity: Novel Insights. *Curr Hypertens Rev.* 2020; 16(1):30-36.
14. Alidu H, Owiredo WKBA, Amidu N, Gyasi-Sarpong CK, Dapare PPM, Bawah AT, et al. Hypertension and obesity comorbidities increases coronary risk, affects domains of sexual function and sexual quality of life. *Int J Impot Res.* 2018; 30(1):8-13.
15. Stannard S, Berrington A, Paranjothy S, Owen R, Fraser S, Hoyle R, et al. A conceptual framework for characterising lifecourse determinants of multiple long-term condition multimorbidity. *Journal of Multimorbidity and Comorbidity.* 2023;13.. doi: 10.1177/26335565231193951.
16. Alwan NA, Stannard S, Berrington A, Paranjothy S, Hoyle RB, Owen RK, et al. Risk factors for ill health: How do we specify what is ‘modifiable’? *PLOS Glob Public Health.* 2024; 4(3): e0002887.
17. Stannard S, Berrington A, Fraser SDS, Paranjothy S, Hoyle RB, Owen RK, et al. Mapping domains of early life determinants of future multimorbidity across three UK longitudinal cohort studies. *Sci Rep.* 2024; 14(1):21454.

18. Stannard S, Owen RK, Berrington A, Ziauddeen N, Fraser SDS, Paranjothy S, et al. Exploring the Relationship Between Early Life Exposures and the Comorbidity of Obesity and Hypertension: Findings from the 1970 The British Cohort Study (BCS70). MedRxiv. 2024. Doi: 10.1101/2024.05.13.24307277.
19. Broom M, Corlett A, Hale S, McCurdy C, Pacitti C. An intergenerational audit for the UK: 2023. Resolution Foundation. 2023; 1-82.
20. Gomulka J, Stern N. The Employment of Married Women in the United Kingdom 1970-83. *Economica*. 1990; 57(226):171–199.
21. Worth E. Women, Education and Social Mobility in Britain during the Long 1970s. *Cultural and Social History*. 2019; 16(1):67–83.
22. Mayhew K, Deer C, Dua M. The move to mass higher education in the UK: many questions and some answers. *Oxford Review of Education*. 2004; 30:65 - 82.
23. Allen RC. Technical change, globalisation and the labour market: British and American experience since 1620. In IFS Deaton Review of Inequalities. 2021. Accessed from: <https://www.ifs.org.uk/inequality/the-interplay-among-wages-technology>. Accessed 15 May 2024.
24. Fraser SDS, Stannard S, Holland E, Boniface M, Hoyle RB, Wilkinson R, et al. Multidisciplinary ecosystem to study lifecourse determinants and prevention of early-onset burdensome multimorbidity (MELD-B) – protocol for a research collaboration. *Journal of Multimorbidity and Comorbidity*. 2023;13. doi: 10.1177/26335565231204544.
25. Power C, Elliott J. Cohort profile: 1958 British birth cohort (National Child Development Study). *Int J Epidemiol*. 2006; 35(1):34-41.
26. Little RJA, Rubin DB. *Statistical Analysis with Missing Data*. 2nd edition. Hoboken, NJ: Wiley; 2002.
27. Horton NJ, Lipsitz SR. Multiple imputation in practice: comparison of software packages for regression models with missing variables. *American Statistical Association*. 2001; 55:244–254.
28. Jakobsen JC, Gluud C, Wetterslev J. When and how should multiple imputation be used for

441 handling missing data in randomised clinical trials—a practical guide with flowcharts. BMC  
 442 Medical Research Methodology. 2017; 17: 162.

443 29. Collins LM, Schafer JL, Kam CM. A Comparison of inclusive and restrictive strategies in  
 444 modern missing data procedures. Psychological Methods. 2001; 6:330–351.

445 30. Mostafa T, Narayanan M, Pongiglione B. Improving the plausibility of the missing at random  
 446 assumption in the 1958 British birth cohort: A pragmatic data driven approach. CLS working  
 447 paper number 2020/6. 2020. [https://cls.ucl.ac.uk/wp-content/uploads/2017/02/CLS-working-](https://cls.ucl.ac.uk/wp-content/uploads/2017/02/CLS-working-paper-2020-6-Improving-the-plausibility-of-the-missing-at-random-assumption-in-the-1958-British-birth-cohort-1.pdf)  
 448 [paper-2020-6-Improving-the-plausibility-of-the-missing-at-random-assumption-in-the-1958-](https://cls.ucl.ac.uk/wp-content/uploads/2017/02/CLS-working-paper-2020-6-Improving-the-plausibility-of-the-missing-at-random-assumption-in-the-1958-British-birth-cohort-1.pdf)  
 449 [British-birth-cohort-1.pdf](https://cls.ucl.ac.uk/wp-content/uploads/2017/02/CLS-working-paper-2020-6-Improving-the-plausibility-of-the-missing-at-random-assumption-in-the-1958-British-birth-cohort-1.pdf). Accessed 20 February 2024.

450 31. Centre for Longitudinal Studies. National Child Development Study – Ethical review and  
 451 Consent. 2017. [https://cls.ucl.ac.uk/wp-content/uploads/2017/07/NCDS-Ethical-review-and-](https://cls.ucl.ac.uk/wp-content/uploads/2017/07/NCDS-Ethical-review-and-Consent-2014.pdf)  
 452 [Consent-2014.pdf](https://cls.ucl.ac.uk/wp-content/uploads/2017/07/NCDS-Ethical-review-and-Consent-2014.pdf). Accessed 1 December 2024.

453 32. Haapanen M, Vetrano D, Mikkola T, Calderón-Larrañaga A, Dekhtyar S, Kajantie E, et al.  
 454 Early growth, stress, and socioeconomic factors as predictors of the rate of multimorbidity  
 455 accumulation across the life course: a longitudinal birth cohort study. The Lancet Healthy  
 456 Longevity. 2023; 5:e56 - e65.

457 33. Harper S, Lynch J, Smith GD. Social determinants and the decline of cardiovascular diseases:  
 458 understanding the links. Annual Review of Public Health. 2011; 32:39-69.

459 34. Humphreys J, Jameson K, Cooper C, Dennison E. Early-life predictors of future multi-  
 460 morbidity: results from the Hertfordshire Cohort. Age Ageing. 2018; 47(3):474-478.

461 35. Johnston MC, Black C, Mercer SW, Prescott GJ, Crilly MA. Impact of educational attainment  
 462 on the association between social class at birth and multimorbidity in middle age in the  
 463 Aberdeen Children of the 1950s cohort study. BMJ Open. 2019; 9(1):e024048.

464 36. Gondek D, Bann D, Brown M, Hamer M, Sullivan A, Ploubidis GB. Prevalence and early-life  
 465 determinants of mid-life multimorbidity: evidence from the 1970 British birth cohort. BMC  
 466 Public Health. 2021; 21(1):1319.

467 37. Furstenberg FF. Fifty Years of Family Change: From Consensus to Complexity. The  
 468 ANNALS of the American Academy of Political and Social Science. 2014; 654(1), 12-30.

38. Kalmijn M. Feeling of Guilt in the Family: The Case of Divorced Parents. In: Mortelmans D (eds). Divorce in Europe New Insights in Trends, Causes and Consequences of Relation Break- ups: New Insights in Trends, Causes and Consequences of Relation Breakups. Springer Open. European Studies of Population, 2020. pp 271-289.
39. Perelli-Harris B, Styrc M. Mental Well-Being Differences in Cohabitation and Marriage: The Role of Childhood Selection. Journal of Marriage and Family. 2017; 80, 239–255.
40. Stannard S, Berrington A, Alwan NA. The mediating pathways between parental separation in childhood and offspring hypertension at midlife. Scientific reports. 2022; 12(1):7062.
41. Perry SE. Fifty Years of Progress in Neonatal and Maternal Transport for Specialty Care. J Obstet Gynecol Neonatal Nurs. 2021; 50(6):774-788.
42. Nuttall FQ. Body Mass Index: Obesity, BMI, and Health. Nutrition Today. 2015; 50(3):117-128.
43. Holland E, Matthews K, Macdonald S, Ashworth M, Laidlaw L, Cheung KSY et al. The impact of living with multiple long-term conditions (multimorbidity) on everyday life – a qualitative evidence synthesis. PREPRINT: Research Square. 2024.
44. Cheng W, Du Y, Zhang Q, Wang X, He C, He J, et al. Age-related changes in the risk of high blood pressure. Frontiers in cardiovascular medicine. 2022; 9:939103.
45. Lu H, Cole S, Platt R, Schisterman E. Revisiting Overadjustment Bias. Epidemiology. 2021; 32(5):e22-e23.
46. Abstract from the 2024 Society for Social Medicine and Poupoulation Health Annual Scientific Meeting. Stannard S, Berrington A, Fraser SDS, Hoyle RB, Paranjothy S, Owen RK, et al. P03 Domains of early-life risk and obesity-hypertension comorbidity: findings from two prospective birth cohorts. J Epidemiol Community Health. 2024;78:A48.
